# Supplementary material for: Detection of copper(ii) and aluminium(iii) by a new bis-benzimidazole Schiff base in aqueous media via distinct routes
Source: Royal Society of Chemistry journal article supplement (doi:10.1039/c5ra18566a), 2015-01-01
Supplement: c5ra18566a5.pdf [file c5ra18566a5.pdf]

## Supplementary Information

### **Detection of Copper (II) and Aluminium (III) by a new bis-benzimidazole Schiff base in aqueous media *via* distinct routes**

Ashish Kumar, Amit Kumar, Mrigendra Dubey, Arnab Biswas and Daya Shankar Pandey\*

*Department of Chemistry, Faculty of Science, Banaras Hindu University, Varanasi - 221 005 (U.P.), India*

| <b><u>Table of Contents:</u></b>                                                                                       | <b><u>Pages</u></b> |
|------------------------------------------------------------------------------------------------------------------------|---------------------|
| 1. Experimental procedures & results and discussion                                                                    | S2-S3               |
| 2. Fig. S1, <sup>1</sup> H and <sup>13</sup> C NMR spectra of <b>BBA</b>                                               | S4                  |
| 3. Fig. S2, <sup>1</sup> H and <sup>13</sup> C NMR spectra of <b>H<sub>3</sub>L</b>                                    | S5                  |
| 4. Fig. S3, ESI-MS of <b>BBA</b> and <b>H<sub>3</sub>L</b>                                                             | S6                  |
| 5. Fig. S4, Unit cell crystal packing and planar difference for <b>H<sub>3</sub>L</b> molecule                         | S7                  |
| 6. Fig. S5, Space-fill view along 'c' direction and H-bonding interactions                                             | S8                  |
| 7. Fig. S6, UV/vis spectra of <b>BBA</b> only, and with tested cations                                                 | S9                  |
| 8. Fig. S7, UV/vis spectra for <b>H<sub>3</sub>L</b> showing mutual interference Cu <sup>2+</sup> and Al <sup>3+</sup> | S9                  |
| 9. Fig. S8, Fluorescence spectra for <b>BBA</b> and <b>H<sub>3</sub>L</b>                                              | S10                 |
| 10. Fig. S9, Fluorescence titration spectra for <b>H<sub>3</sub>L</b> at c, 1.0 x 10 <sup>-5</sup> M                   | S10                 |
| 11. Fig. S10, Effect of Al <sup>3+</sup> on fluorescence spectra of <b>BBA</b>                                         | S11                 |
| 12. Fig. S11, Job's plot for <b>H<sub>3</sub>L</b> with Cu <sup>2+</sup> and Al <sup>3+</sup> from emission data       | S11-12              |
| 13. Fig. S12, Benesi-Hildebrand plots of <b>H<sub>3</sub>L</b> for Al <sup>3+</sup>                                    | S12                 |
| 14. Fig. S13, pH experiments on <b>H<sub>3</sub>L</b> vs HCl (0.1 M)                                                   | S13                 |
| 15. Fig. S14, Expanded view of <sup>1</sup> H NMR spectra for <b>H<sub>3</sub>L</b> and <b>BBA</b>                     | S14                 |
| 16. Fig. S15, <sup>1</sup> H NMR of <b>H<sub>3</sub>L</b> showing deuterium exchange                                   | S15                 |
| 16. Fig. S16, ESI-MS of <b>1</b> and <b>2</b>                                                                          | S16                 |
| 17. Fig. S17, Optimized structures of complex <b>1</b> and <b>2</b>                                                    | S17                 |
| 18. Fig. S18, Powder X-ray diffractograms of <b>H<sub>3</sub>L</b> , <b>1</b> and <b>2</b>                             | S17                 |
| 19. Table S1, List of bond lengths and bond angles for <b>H<sub>3</sub>L</b>                                           | S18                 |
| 20. References                                                                                                         | S19                 |

## Experimental details:

**General procedures.** Elemental analyses on samples were performed in the Micro Analytical Laboratory of SAIF, Central Drug Research Institute (CDRI) Lucknow. IR and UV/vis spectra were acquired on PerkinElmer Spectrum Version 10.03.05 FT-IR and Shimadzu UV-1601 spectrophotometers, respectively.  $^1\text{H}$  (300 MHz) and  $^{13}\text{C}$  (75.45 MHz) NMR spectra were acquired at room temperature (rt) on a JEOL AL300 FT-NMR spectrometer using tetra-methylsilane [ $\text{Si}(\text{CH}_3)_4$ ] as an internal reference. Fluorescence spectra were obtained in methanol water mixture (MeOH/ $\text{H}_2\text{O}$ , 9:1, v/v) on a PerkinElmer LS-55 Fluorescence Spectrometer at rt. Electrospray ionization mass spectrometric (ESI-MS) measurements were made on a THERMO Finnigan LCQ Advantage Max ion-trap mass spectrometer. Limit of detection (LOD) were evaluated using linear calibration plots of quantitative fluorescence response for  $\text{H}_3\text{L}$  vs.  $\text{Cu}^{2+}$  and  $\text{Al}^{3+}$  (for the band at 485 and 466 nm, respectively). It has been calculated as  $3\sigma/s$ , where  $\sigma$  is the standard deviation of the blank signal and 's' is the slope of corresponding linear calibration plot. Quantum chemical calculations have been performed using a hybrid version of DFT method, namely B3LYP.<sup>1</sup> Basis set 6-31G\*\* was used for C, H, N and O, while LANL2DZ for Cu and Al which combines quasi-relativistic effective core potentials with a valence double basis-set.<sup>2</sup> Geometry optimization and frequency calculations (to verify a genuine minimum energy structure) for  $\text{H}_3\text{L}$ , complex **1** and **2** were performed using Gaussian 09 programme.<sup>3</sup>

**UV/vis and fluorescence studies.** Stock solution of **BBA** and  $\text{H}_3\text{L}$  ( $1.0 \times 10^{-3}$  M) were prepared in MeOH/ $\text{H}_2\text{O}$  (9:1; v/v) and their diluted solutions were used for UV/vis and fluorescence studies. Stock solutions of various metal ions viz.  $\text{Na}^+$ ,  $\text{K}^+$ ,  $\text{Mg}^{2+}$ ,  $\text{Ca}^{2+}$ ,  $\text{Fe}^{3+}$ ,  $\text{Mn}^{2+}$ ,  $\text{Co}^{2+}$ ,  $\text{Ni}^{2+}$ ,  $\text{Cu}^{2+}$ ,  $\text{Ag}^+$ ,  $\text{Zn}^{2+}$ ,  $\text{Cd}^{2+}$ ,  $\text{Hg}^{2+}$ ,  $\text{Al}^{3+}$  and  $\text{Pb}^{2+}$  ( $c$ ,  $1.0 \times 10^{-1}$  M) were prepared by dissolving nitrate salts ( $\text{NO}_3^-$ ) of respective metals in triply distilled water and used after required dilutions ( $c$ ,  $1.0 \times 10^{-2}$  M,  $1.0 \times 10^{-3}$  M). In a typical UV/vis or fluorescence titration experiment, solution of **BBA**/ $\text{H}_3\text{L}$  was taken in a quartz cuvette (3.0 mL; path length, 1 cm) and treated gradually with dilute solution of the metal ions with the help of a micropipette. Observed spectral changes were noted as a function of equivalent of metal ions after  $\sim 1$  min. of each addition and experiments were repeated thrice.

**X-ray structure determinations.** Crystals suitable for single crystal X-ray diffraction analyses were obtained from DCM/MeOH (v/v, 1:1) solution of  $\text{H}_3\text{L}$ . The crystal was

mounted on a glass fibre. All the geometric and intensity data were collected at 293 K on a Rigaku Saturn 724+ CCD diffractometer with a fine-focus sealed tube Cu-K $\alpha$  ( $\lambda = 1.54184 \text{ \AA}$ ) X-ray source with increasing  $\omega$  (width of 0.3 per frame) at a scan speed of either 3 or 5 s/frame. After initial solution of the reflection data, refinement was performed by WinGX environment using direct methods (SHELXL 97) and full-matrix least squares on  $F^2$  (SHELX 97).<sup>4</sup> All non-hydrogen atoms were refined anisotropically and hydrogen atoms geometrically fixed and refined as per the riding model. Powder X-ray diffraction data was collected on a Bruker Eco D8 Advanced X-ray diffractometer between angle  $2\theta = 5\text{--}60^\circ$ .

## Results and discussion

**Deuterium ion exchange experiment on H<sub>3</sub>L.** To investigate the interactions between benzimidazole group and Al<sup>3+</sup> a hydrogen-deuterium exchange in H<sub>3</sub>L (dms-*d*<sub>6</sub>) in presence of blank D<sub>2</sub>O (only a trace amount) has been monitored through <sup>1</sup>H NMR experiment. The experiment displayed a feeble loss for –NH signal and a drastic loss for –OH signal after immediate addition of D<sub>2</sub>O only. With increase in time, it has been noted that shortly after addition of D<sub>2</sub>O, the –OH signal disappeared almost completely while the –NH signal persists over a significant period of time (~1 h, including time for scanning). This substantiates more stability of –NH than –OH under biased deuterium exchange conditions in the solution. In other words, it significantly proves the interaction between Al<sup>3+</sup> and –NH of benzimidazole because, in the H<sub>3</sub>L vs. Al<sup>3+</sup> titration, signal for –NH was found to be disappeared prior to the signal for –OH which should not occur if deuterium exchange dominates over interaction involved with Al<sup>3+</sup>. Therefore, it has been concluded from the <sup>1</sup>H NMR studies that drastic loss of resonance for –NH proton occurred predominantly due to the presence Al<sup>3+</sup> and also that benzimidazole is more reactive towards Al<sup>3+</sup>.

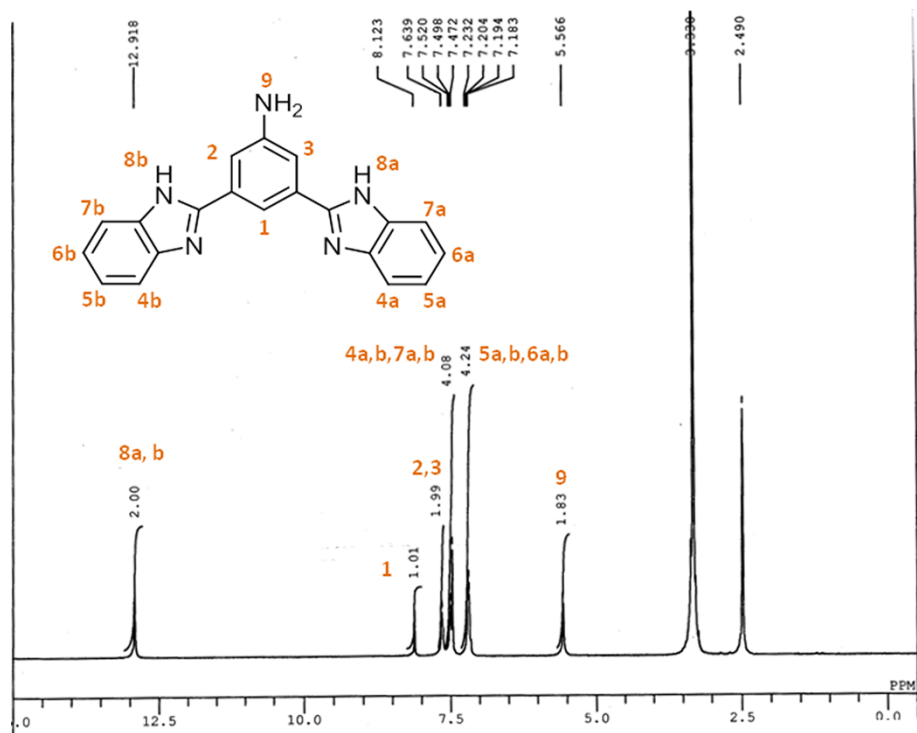

(a)

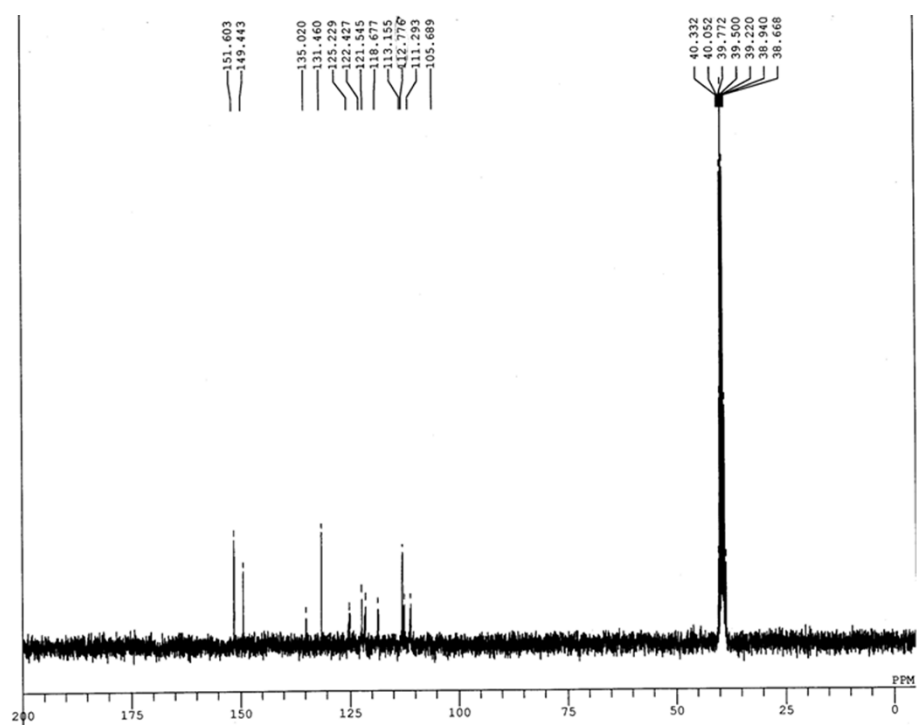

(b)

**Fig. S1** (a) <sup>1</sup>H NMR and (b) <sup>13</sup>C NMR spectra of 3,5-bis(1H-benzimidazol-2-yl)aniline (BBA).

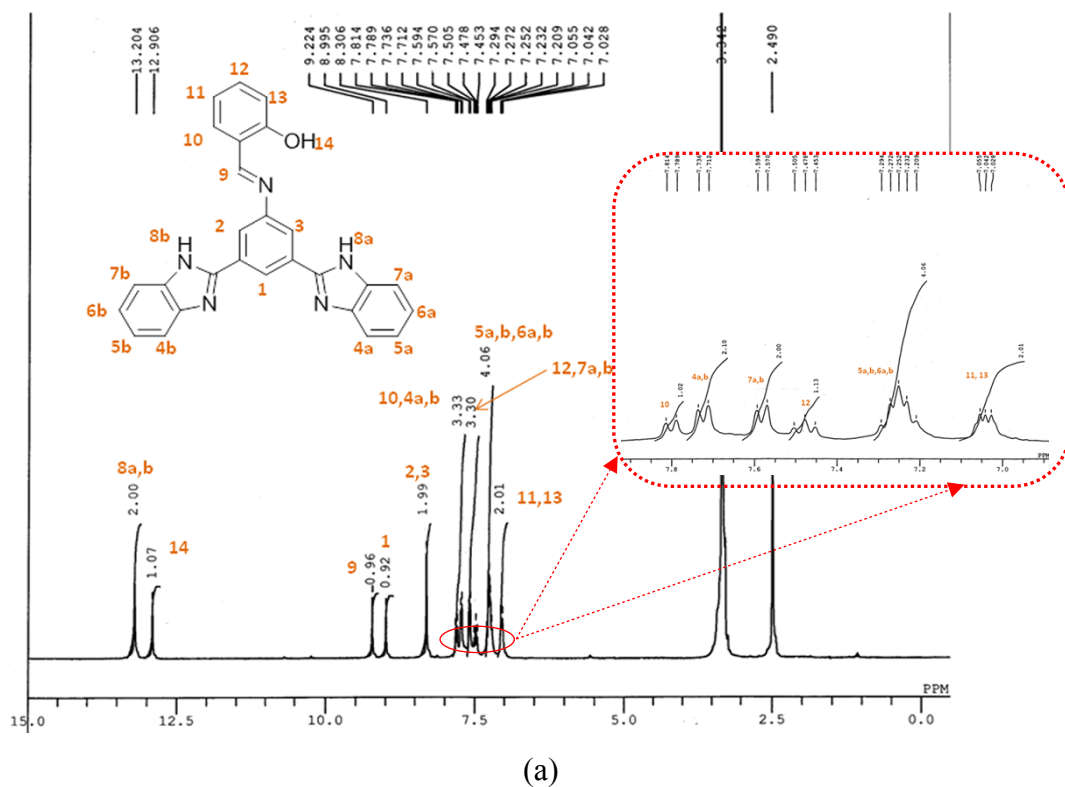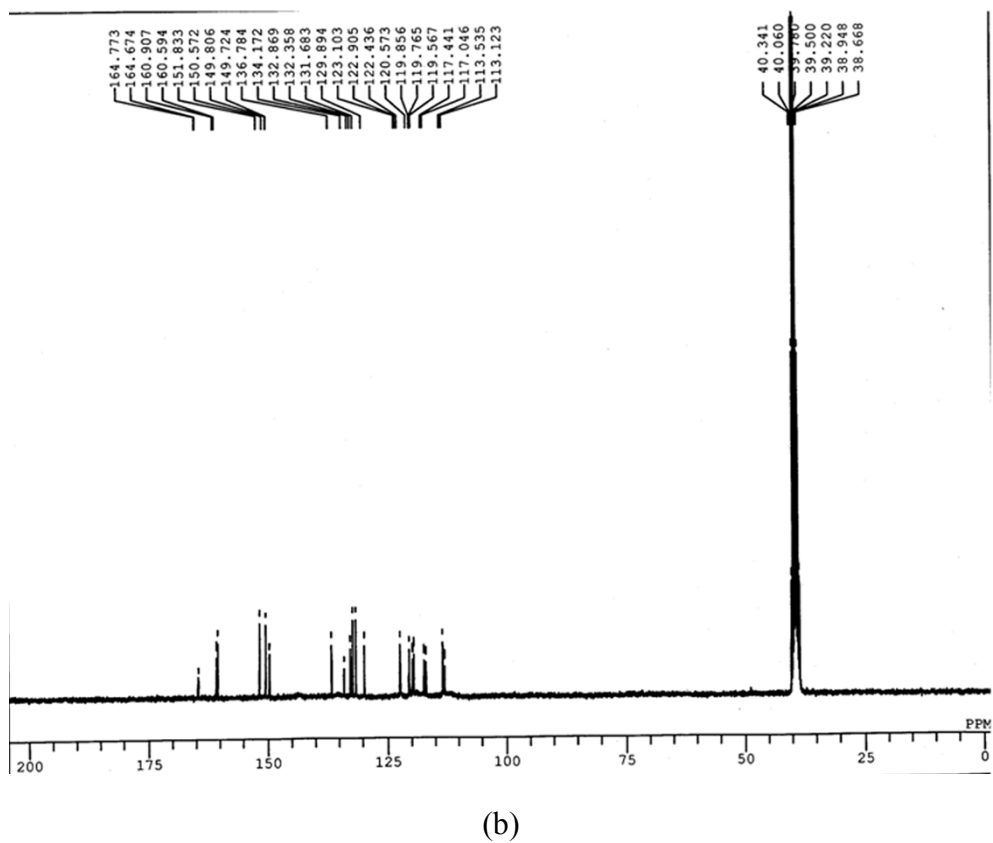

**Fig. S2** (a) <sup>1</sup>H and (b) <sup>13</sup>C NMR spectrum of 2-(3,5-bis(1H-benzimidazol-2-yl)phenyl-imino-methyl)phenol (**H<sub>3</sub>L**).

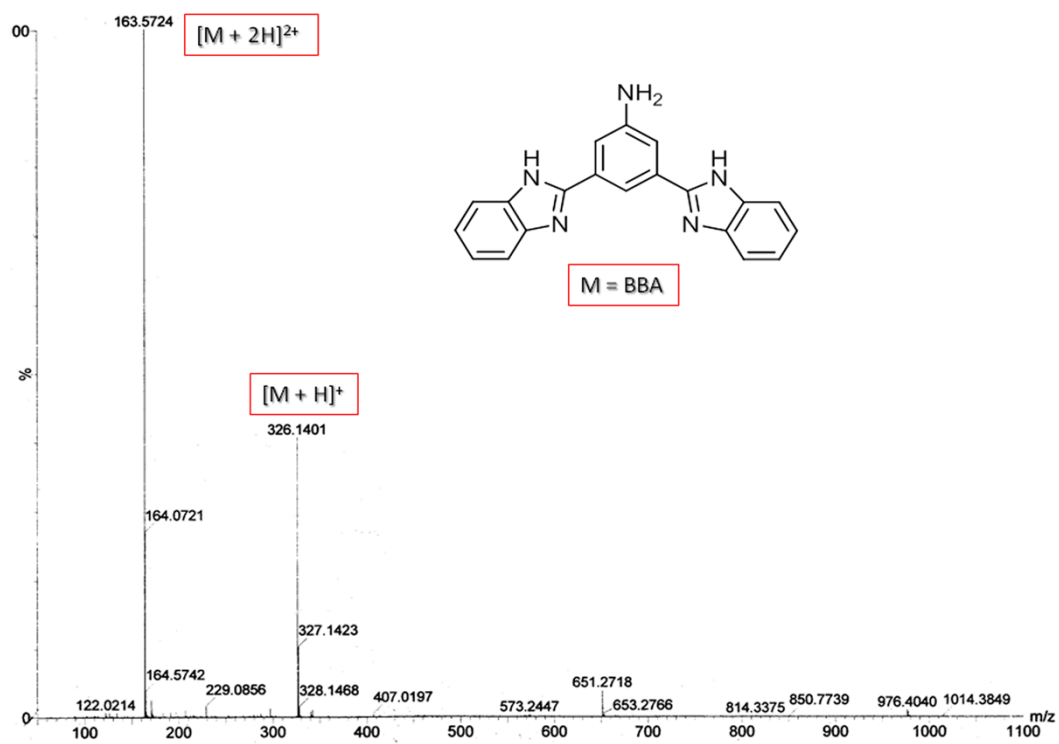

(a)

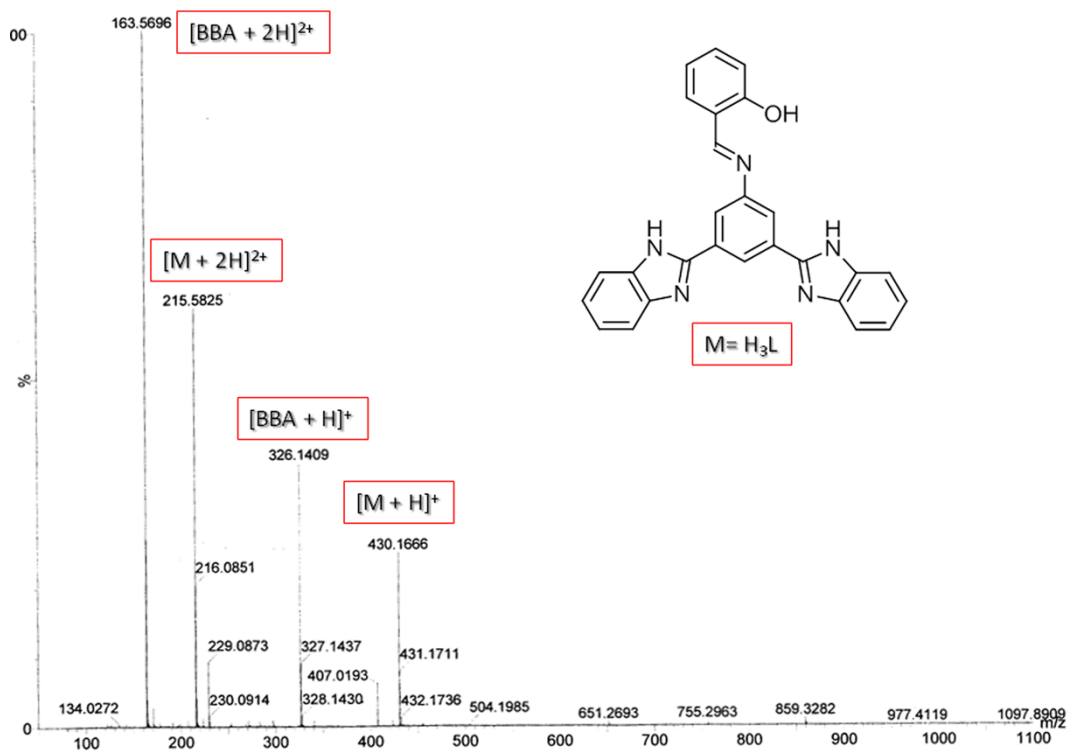

(b)

Fig. S3 (a) ESI-MS of BBA and (b) H<sub>3</sub>L.

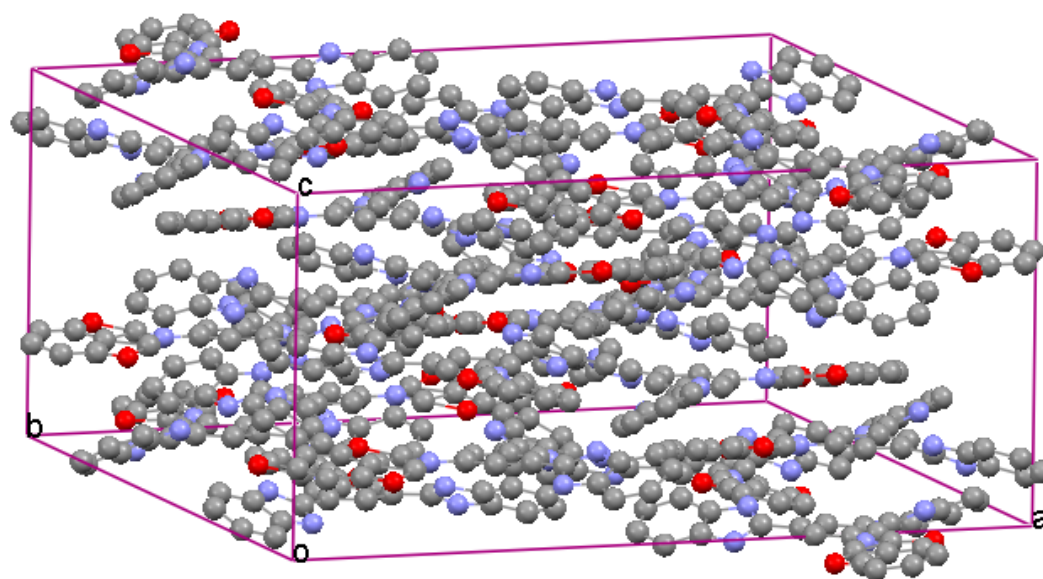

(a)

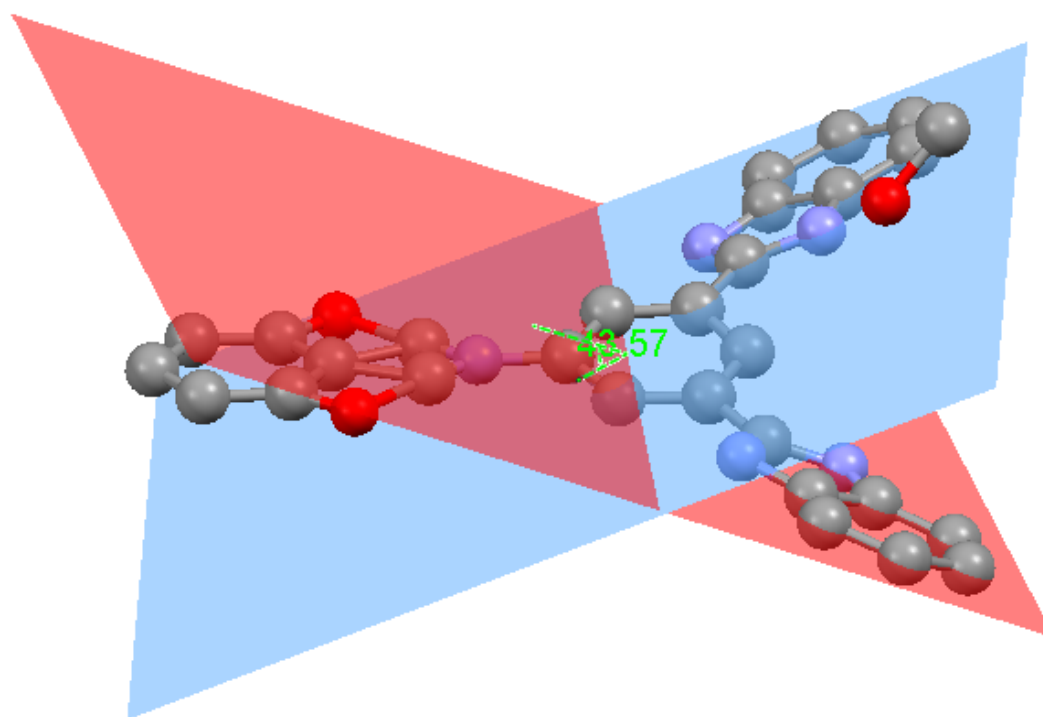

(b)

**Fig. S4** (a) Crystallographic packing of  $\text{H}_3\text{L}$ . (a) Difference between the planes associated with both benzimidazole rings which are found to be  $43.57^\circ$ . This type of twisting may be related to affect PET. (c) Extended structure of  $\text{H}_3\text{L}$  in crystallographic ‘ $ab$ ’ plane showing anti-parallel arrangement of subsequent units.

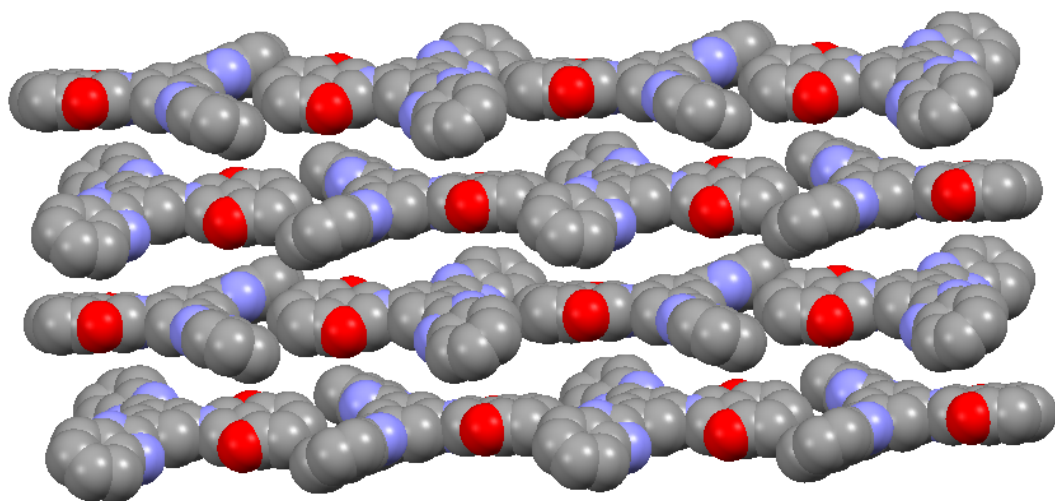

(a)

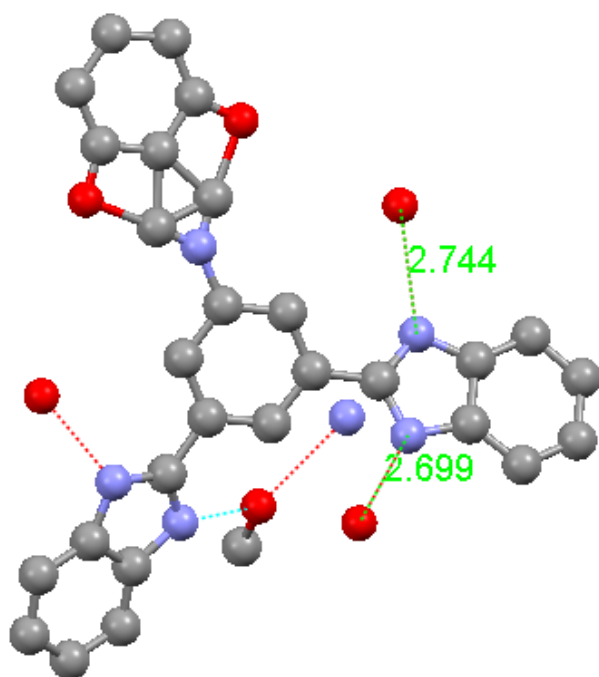

(b)

**Fig. S5** (a) The anti-parallel arrangement of  $\text{H}_3\text{L}$  along crystallographic ' $c$ ' axis in ' $ab$ ' plane. (b) Hydrogen bonding interactions associated with methanol solvent molecule.



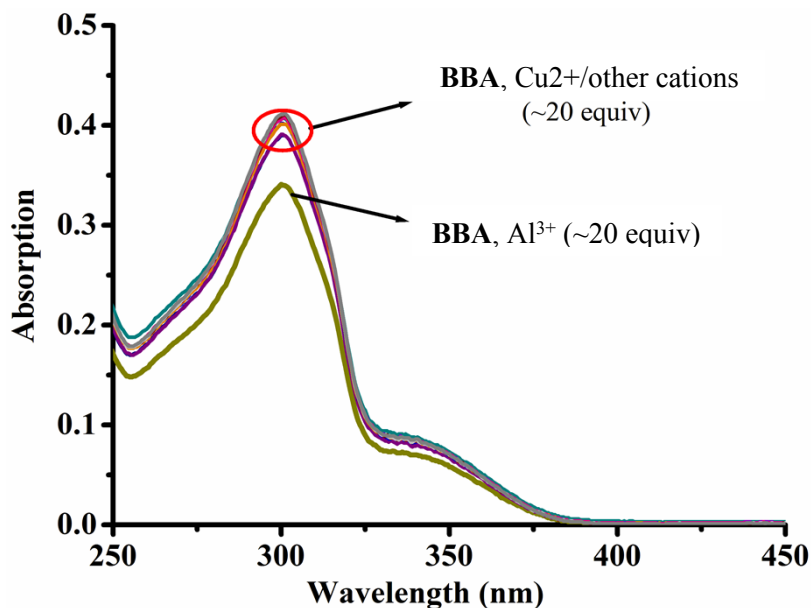

**Fig. S6** (a) UV/vis spectra of **BBA** ( $c$ ,  $1.0 \times 10^{-5}$  M; MeOH/H<sub>2</sub>O, 9:1, v/v) only, and in presence of several metal ions. (b) UV/vis spectra showing the effect of Al<sup>3+</sup> (20.0 equiv) on **BBA**. Considerably large quantity of Al<sup>3+</sup> needed has been attributed towards low sensitivity.

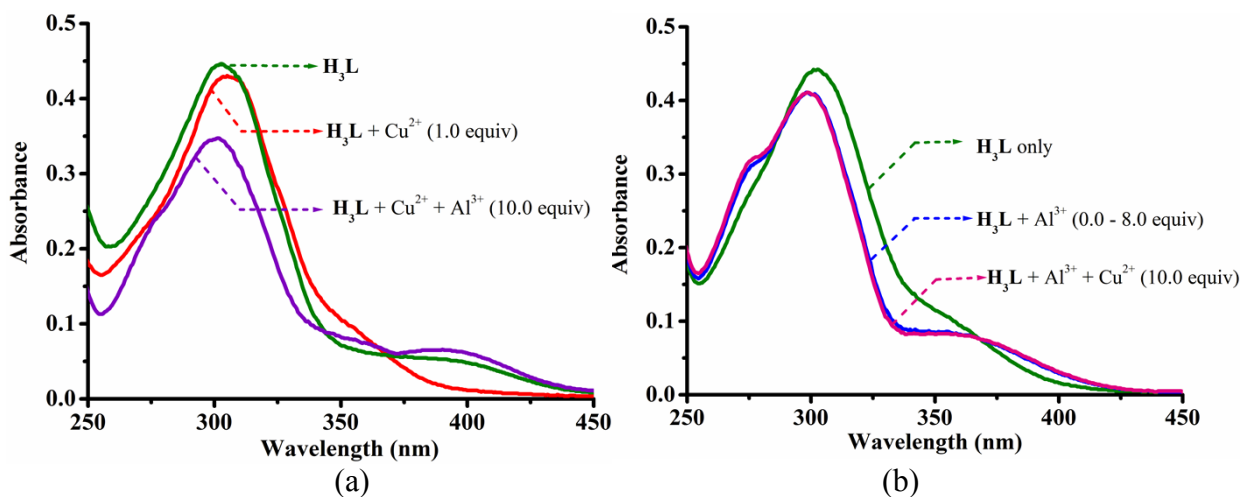

**Fig. S7** UV/vis spectra of **H<sub>3</sub>L** ( $c$ ,  $1.0 \times 10^{-5}$  M; MeOH/H<sub>2</sub>O, 9:1, v/v) showing mutual interference of Al<sup>3+</sup> and Cu<sup>2+</sup> respectively.

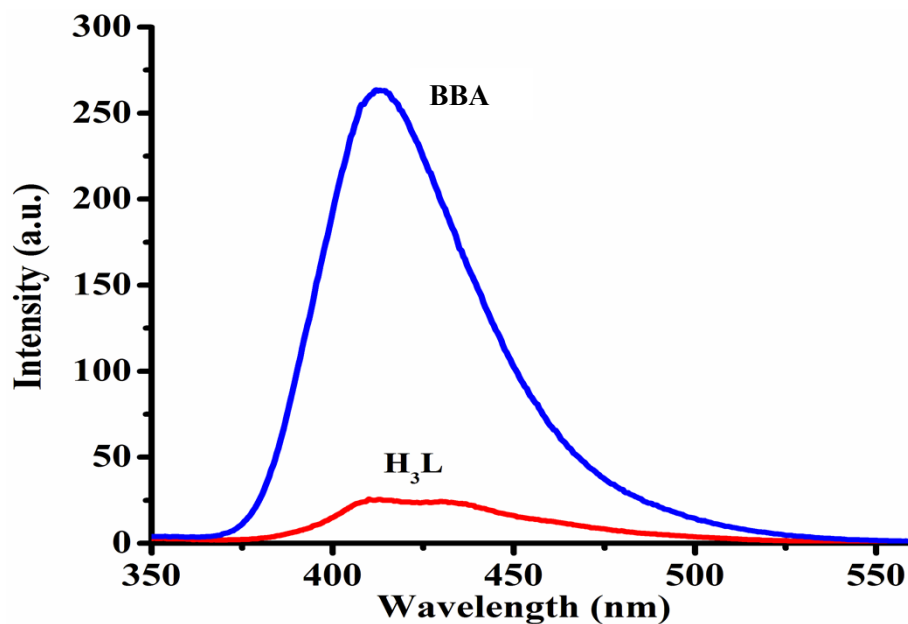

**Fig. S8** Fluorescence spectra of  $H_3L$  and (b) **BBA** ( $c$ ,  $1.0 \times 10^{-6}$  M; MeOH/H<sub>2</sub>O, 9:1, v/v; pH  $\sim 7.2$ ).

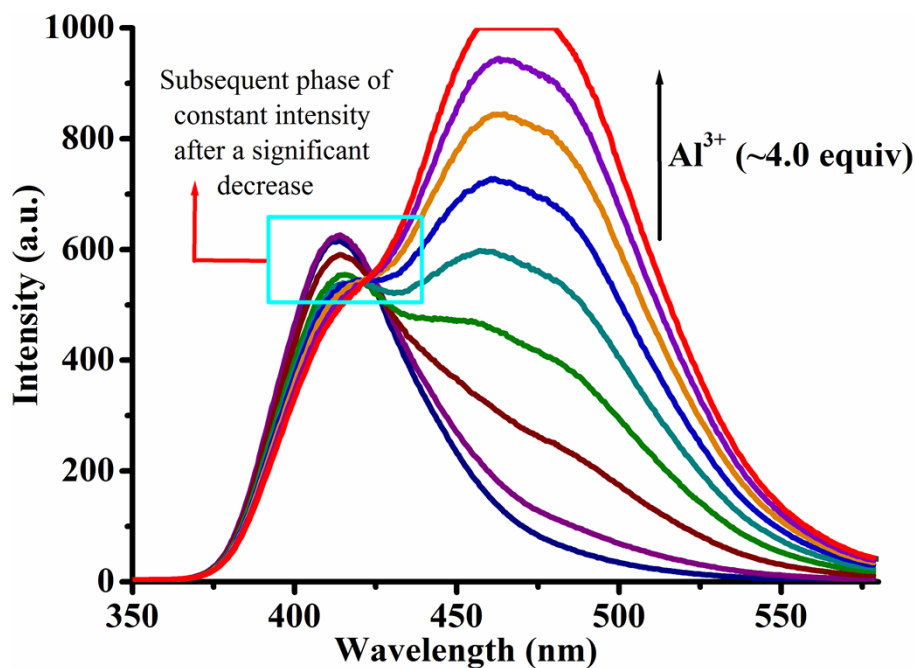

**Fig. S9** Fluorescence titration spectra of  $H_3L$  at  $c$ ,  $1.0 \times 10^{-5}$  M [MeOH/H<sub>2</sub>O, 9:1, v/v] in presence of  $Al^{3+}$ . It has been performed anonymously just to show clear *binary spectral behaviour* pertaining to the involvement of benzimidazole and salen interactions in a cumulative manner.

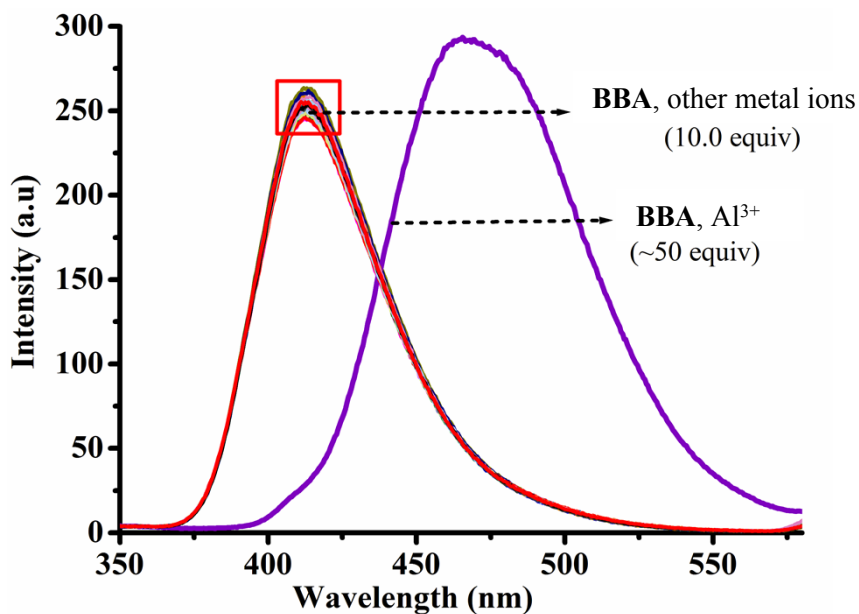

**Fig. S10** Fluorescence titration spectra of **BBA** [ $c$ ,  $1.0 \times 10^{-6}$  M; MeOH/H<sub>2</sub>O, 9:1, v/v] only and in the presence of various metal ions (10.0 equiv). In presence of excess of Al<sup>3+</sup> (~50 equiv) significant changes occurs confirming benzimidazole-Al<sup>3+</sup> interactions.

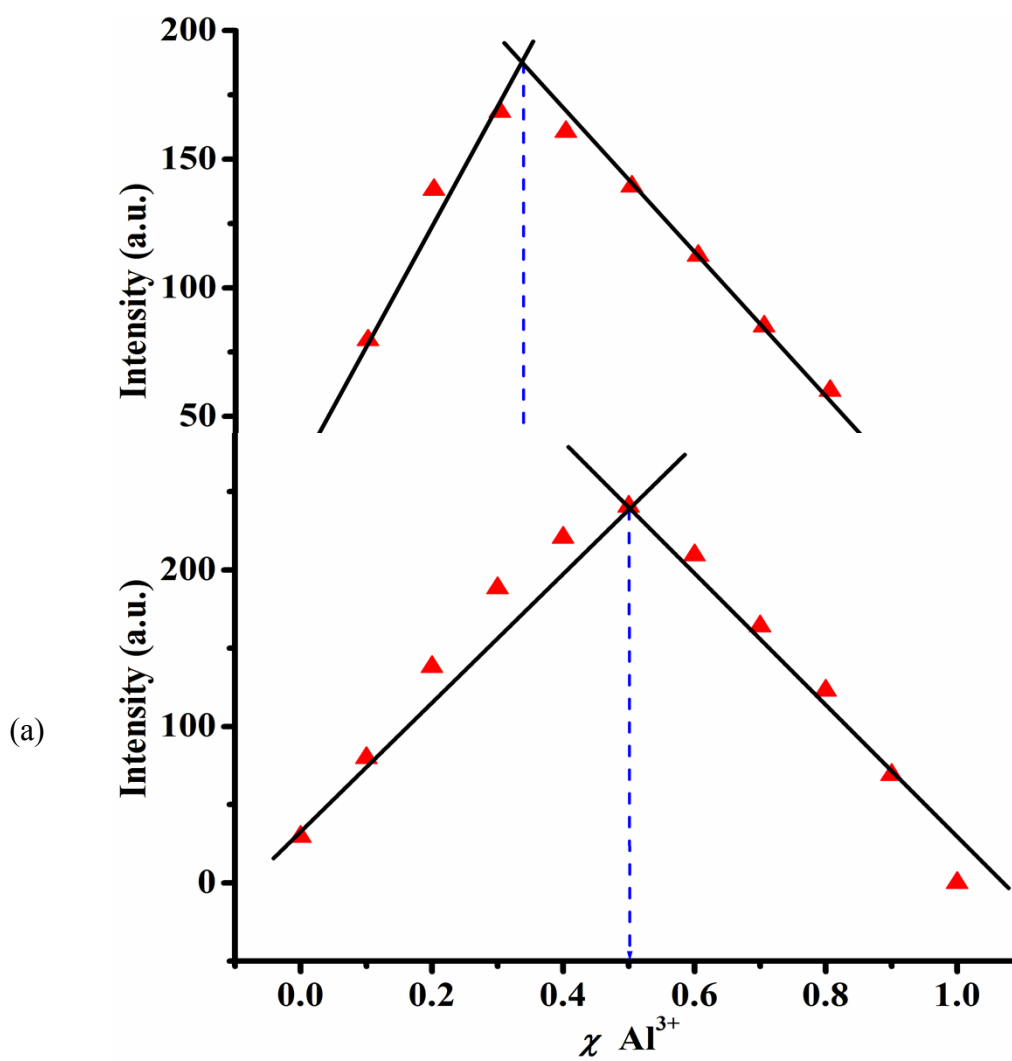

(b)

**Fig. S11** Job's plot analyses for the stoichiometric determination of (a)  $\text{H}_3\text{L} + \text{Cu}^{2+}$  and (b)  $\text{H}_3\text{L} + \text{Al}^{3+}$ . Former shows 1:2 stoichiometry whereas latter exhibits 1:1 stoichiometric ratio between the probe and respective analytes.

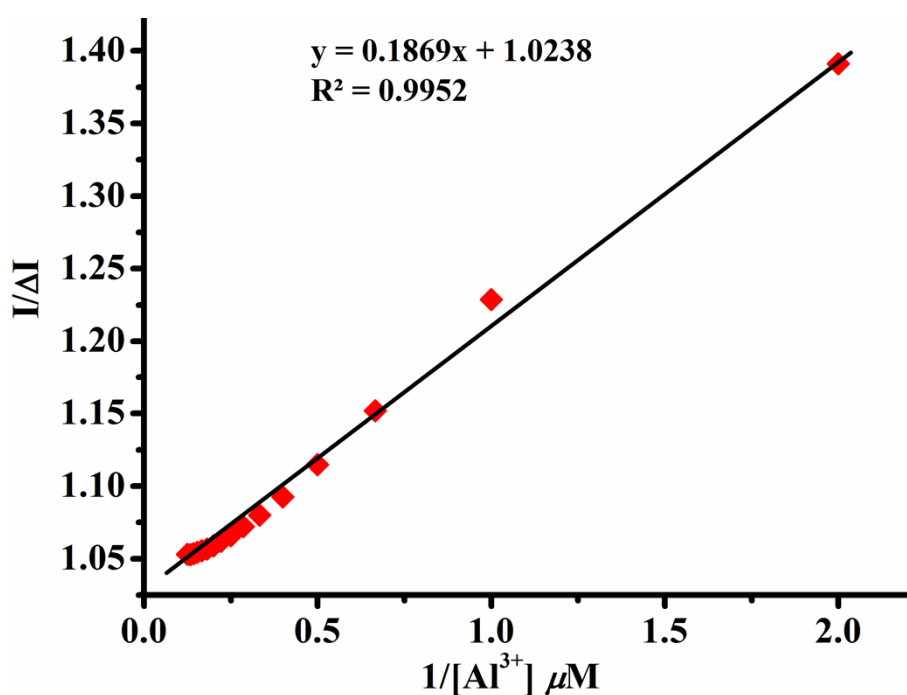

**Fig. S12** Benesi Hildebrand plot for  $\text{H}_3\text{L} + \text{Al}^{3+}$  from the fluorescence spectral data considering 1:1 stoichiometry.

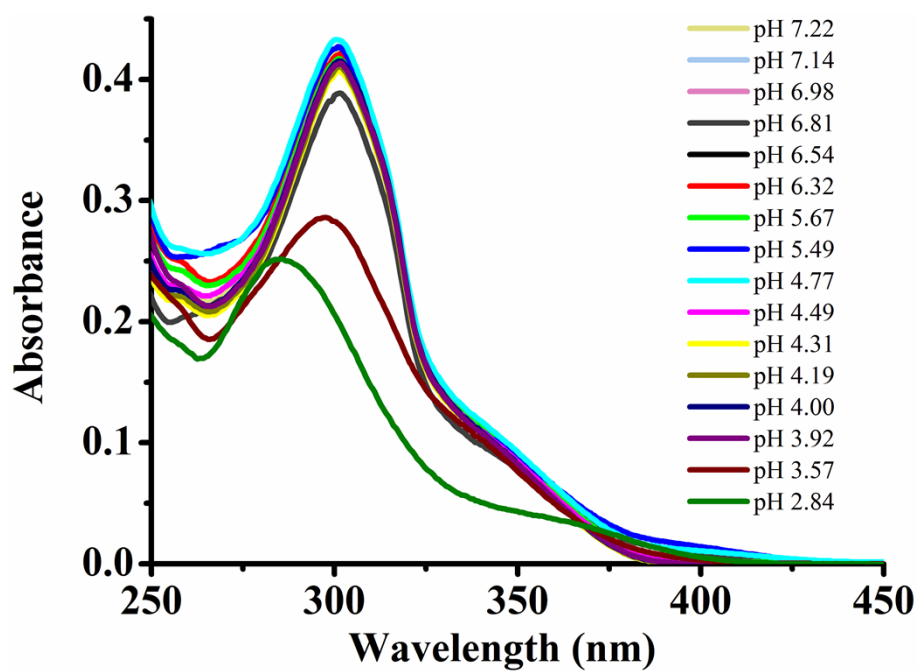

(a)

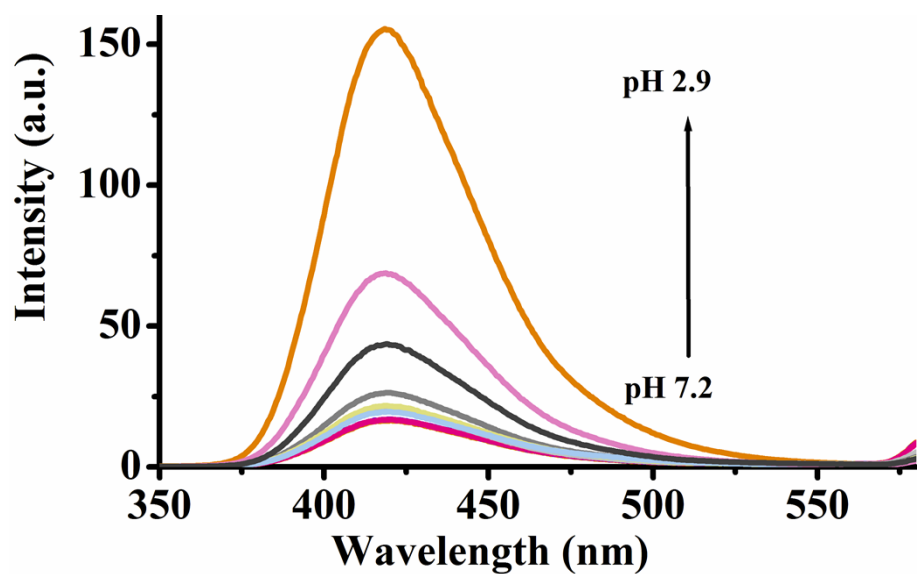

(b)

**Fig. S13** (a) UV/vis and (b) Fluorescence experiments for  $H_3L$  with 0.1 M HCl solution to verify  $pH$  dependence. The experiment exhibited spectral changes which were ascribable to the deprotonation of  $H_3L$  but insignificant enough to pose any considerable interference in the detection of  $Al^{3+}/Cu^{2+}$ .

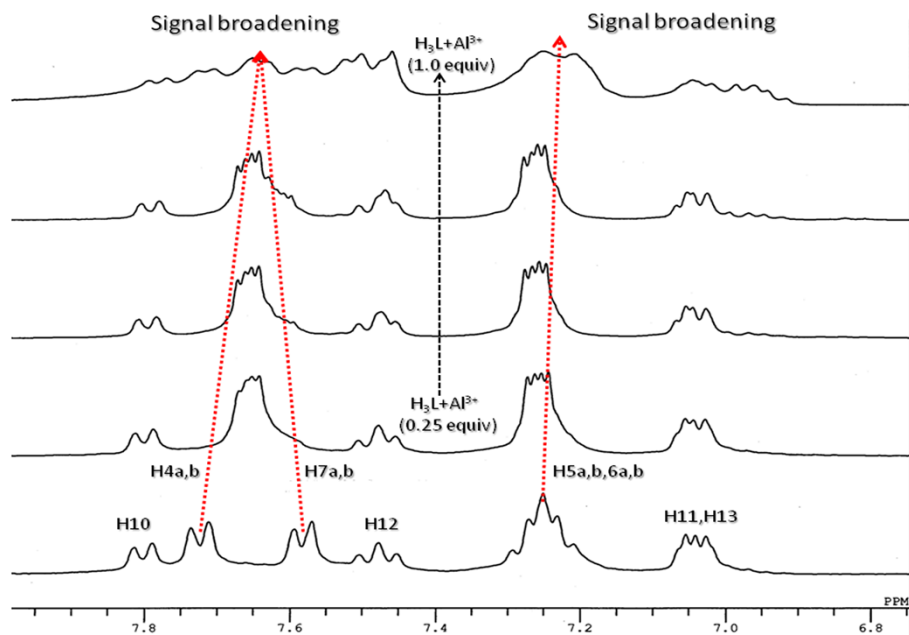

(a)

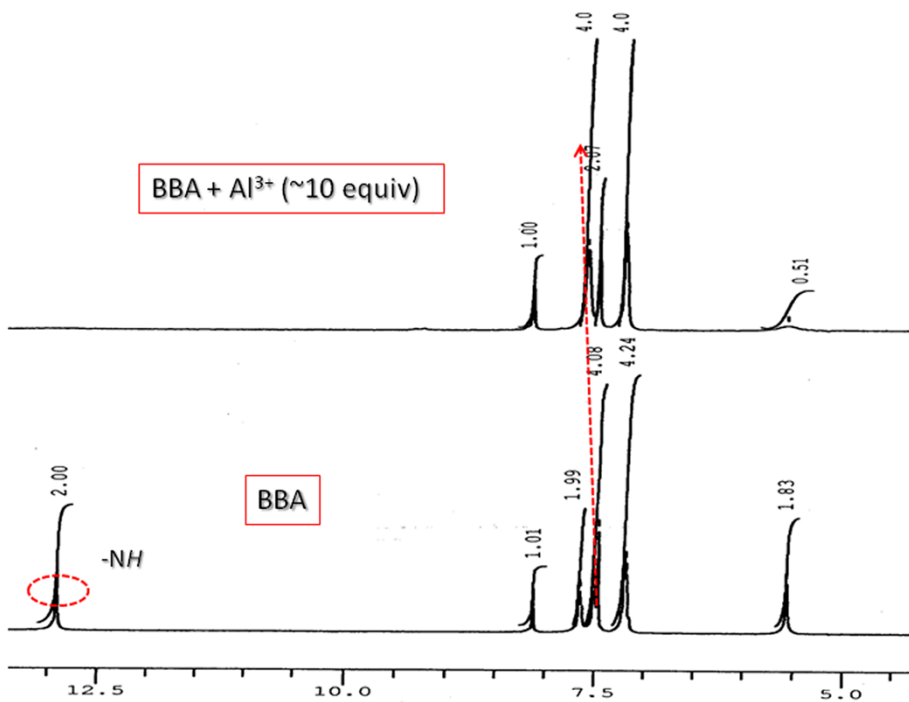

(b)

**Fig. S14** (a) Partial  $^1\text{H}$  NMR titration spectral overlay for  $\text{H}_3\text{L}$  vs.  $\text{Al}^{3+}$  showing significant chemical shifts for the benzimidazole protons. (b)  $^1\text{H}$  NMR spectra for **BBA** showing significant shift of benzimidazole aromatic protons and complete disappearance of  $-\text{NH}$  signal in presence of  $\text{Al}^{3+}$ .

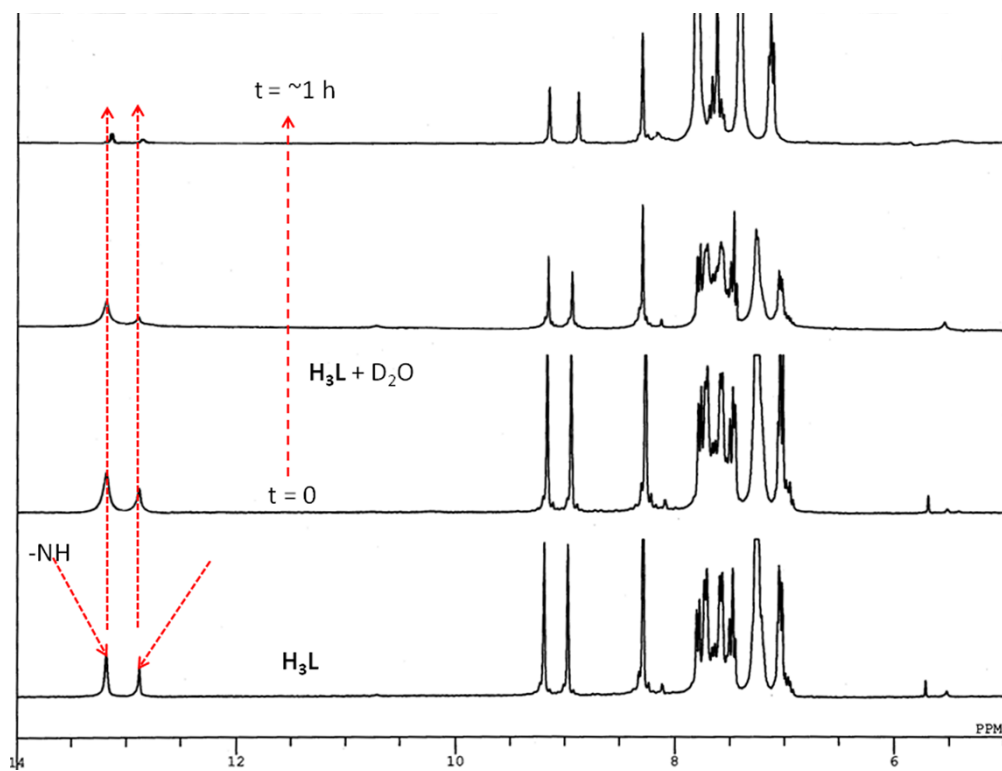

**Fig. S15**  $^1\text{H}$  NMR spectrum of  $\text{H}_3\text{L}$  only ( $\text{dms0-d}_6$ ) and in presence of traces of blank  $\text{D}_2\text{O}$ .

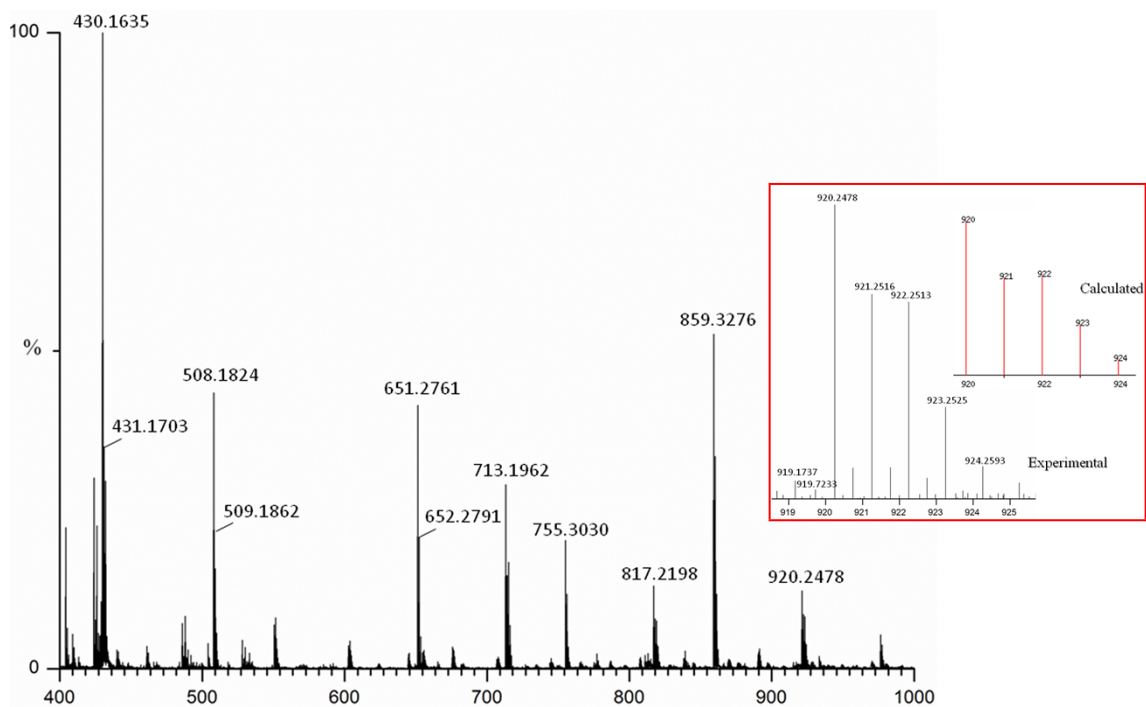

(a)

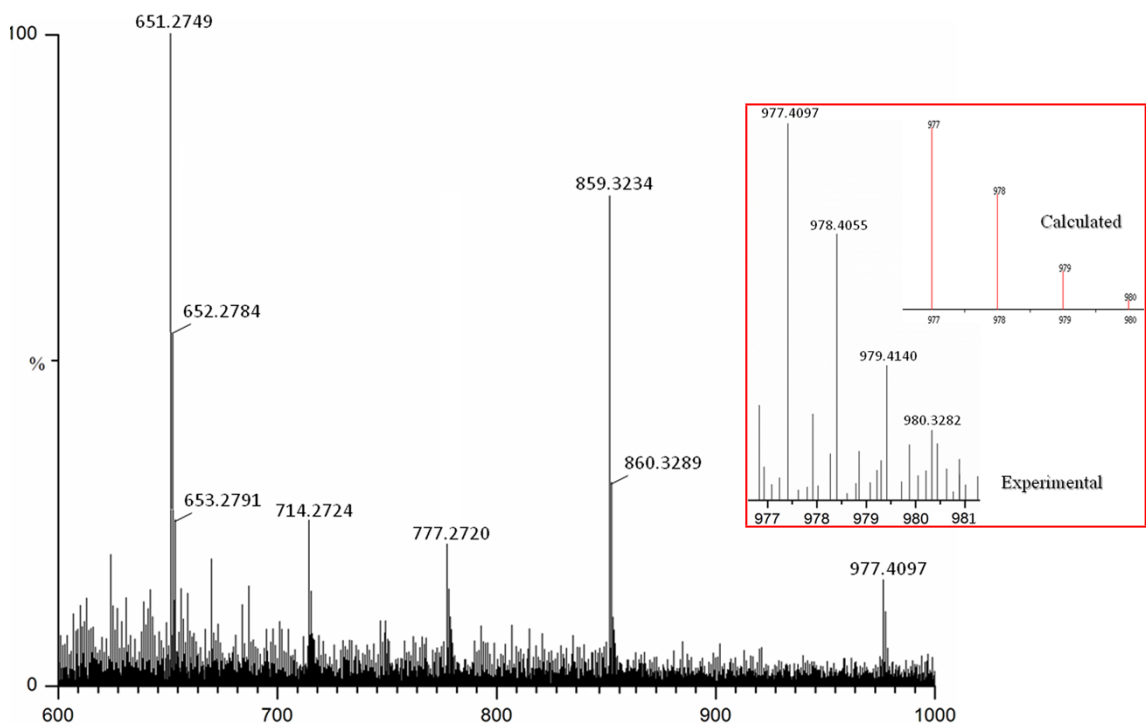



(b)

**Fig. S16** ESI-MS of (a) complex **1** and (b) complex **2**. These exhibit a good agreement with their relevant isotopic patterns on comparison with their respective calculated data (insets).

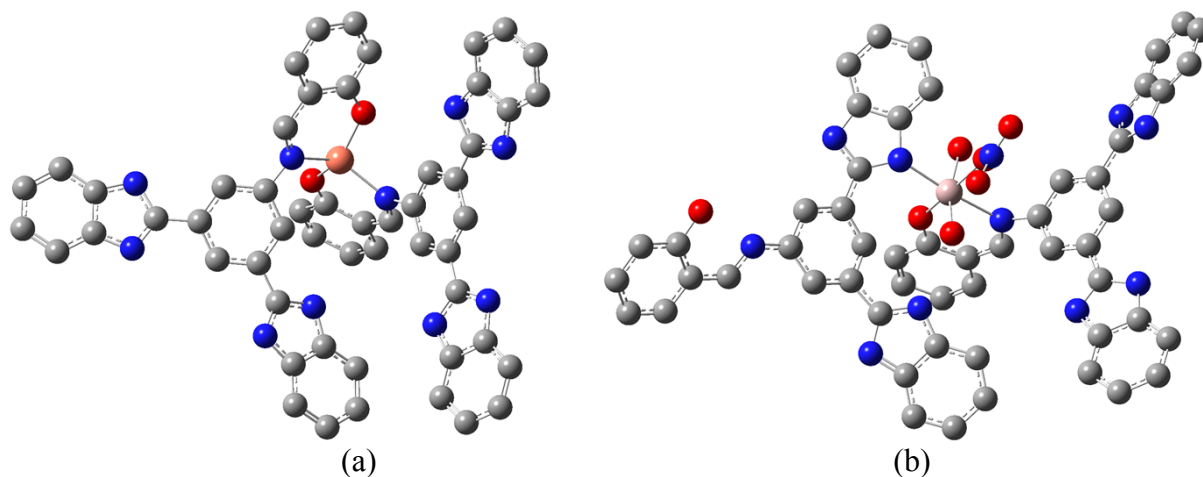

**Fig. S17** DFT optimized structures of (a) Cu<sup>II</sup>-complex (**1**) and (b) Al<sup>III</sup>-complex (**2**).

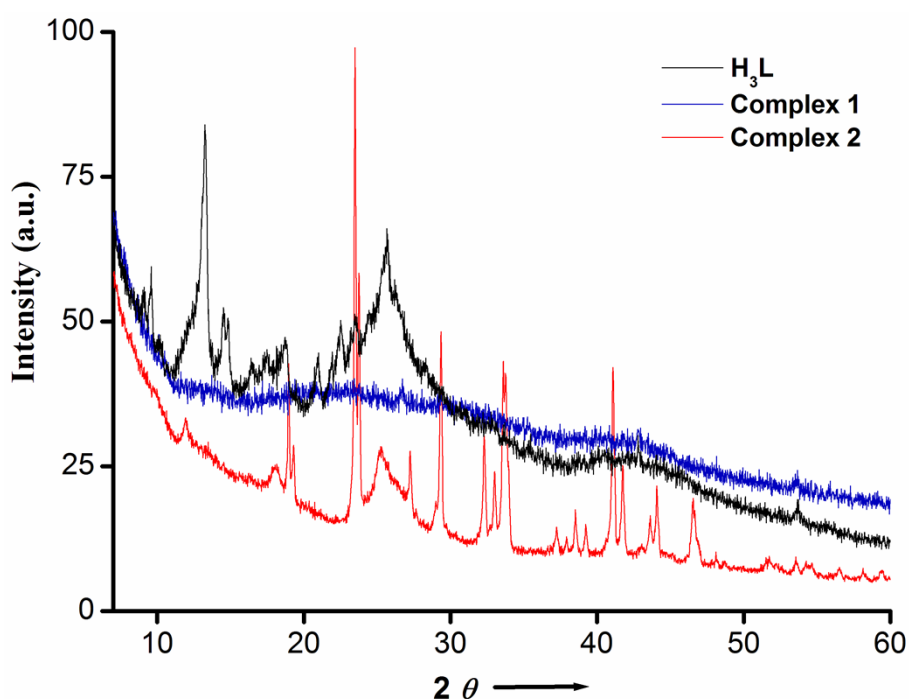

**Fig. S18** Powder X-ray diffraction pattern of H<sub>3</sub>L, complex **1** (H<sub>3</sub>L + Cu<sup>2+</sup>) and complex **2** (H<sub>3</sub>L + Al<sup>3+</sup>). Diffractograms for **1** and **2** are quite different from H<sub>3</sub>L substantiating the formations of respective complexes. However, peak intensity for **1** are very diminished

showing its amorphous nature however for 2, a well defined crystalline structure is signified provided that some in-situ generated metal-salts after drying cannot be ruled out in the PXRD pattern of 2.<sup>5</sup>

**Table S1.** Bond Lengths (Å) and Angles (°) for **H<sub>3</sub>L**.

|                         |          |                                        |           |
|-------------------------|----------|----------------------------------------|-----------|
| N2—C5                   | 1.357(4) | C10—C9                                 | 1.383(6)  |
| N2—C11                  | 1.377(5) | N3—C12                                 | 1.074(8)  |
| N1—C5                   | 1.313(4) | N3—C12 <sup>i</sup>                    | 1.074(8)  |
| N1—C6                   | 1.395(4) | C9—C8                                  | 1.392(7)  |
| C1—C2                   | 1.392(4) | C12—C12 <sup>i</sup>                   | 1.411(16) |
| C1—C2 <sup>i</sup>      | 1.392(4) | C12—C13                                | 1.619(11) |
| C2—C3                   | 1.395(4) | C12—O1                                 | 1.735(10) |
| C2—C5                   | 1.470(4) | O2—C17                                 | 1.415(5)  |
| C4—C3 <sup>i</sup>      | 1.395(4) | O1—C14                                 | 1.192(9)  |
| C4—C3                   | 1.395(4) | C16—C15 <sup>i</sup>                   | 1.377(7)  |
| C4—N3                   | 1.393(7) | C16—C15                                | 1.377(7)  |
| C11—C10                 | 1.385(5) | C15—C14                                | 1.371(8)  |
| C11—C6                  | 1.407(5) | C14—C13                                | 1.365(10) |
| C6—C7                   | 1.397(5) | C13—C14 <sup>i</sup>                   | 1.365(10) |
| C7—C8                   | 1.371(6) | C13—C12 <sup>i</sup>                   | 1.619(11) |
| C5—N2—C11               | 107.2(3) | C12—N3—C4                              | 138.9(4)  |
| C5—N1—C6                | 104.9(3) | C12 <sup>i</sup> —N3—C4                | 138.9(4)  |
| C2—C1—C2 <sup>i</sup>   | 121.2(4) | C10—C9—C8                              | 122.0(4)  |
| C1—C2—C3                | 119.1(3) | C7—C8—C9                               | 121.7(4)  |
| C1—C2—C5                | 118.5(3) | N3—C12—C12 <sup>i</sup>                | 48.9(4)   |
| C3—C2—C5                | 122.4(3) | N3—C12—C13                             | 113.1(6)  |
| C3 <sup>i</sup> —C4—C3  | 119.4(4) | C12 <sup>i</sup> —C12—C13              | 64.2(3)   |
| C3 <sup>i</sup> —C4—N3  | 120.3(2) | N3—C12—O1                              | 176.2(7)  |
| C3—C4—N3                | 120.3(2) | C12 <sup>i</sup> —C12—O1               | 134.5(3)  |
| C4—C3—C2                | 120.6(3) | C13—C12—O1                             | 70.4(4)   |
| N2—C11—C10              | 132.3(3) | C14—O1—C12                             | 96.2(7)   |
| N2—C11—C6               | 105.2(3) | C15 <sup>i</sup> —C16—C15              | 119.7(7)  |
| C10—C11—C6              | 122.5(4) | C16—C15—C14                            | 119.3(8)  |
| N1—C5—N2                | 113.4(3) | O1—C14—C13                             | 98.2(6)   |
| N1—C5—C2                | 123.4(3) | O1—C14—C15                             | 139.9(12) |
| N2—C5—C2                | 123.2(3) | C13—C14—C15                            | 121.9(9)  |
| N1—C6—C7                | 130.8(3) | C14 <sup>i</sup> —C13—C14              | 118.0(8)  |
| N1—C6—C11               | 109.4(3) | C14 <sup>i</sup> —C13—C12 <sup>i</sup> | 95.2(4)   |
| C7—C6—C11               | 119.8(3) | C14—C13—C12 <sup>i</sup>               | 146.9(6)  |
| C8—C7—C6                | 117.7(4) | C14 <sup>i</sup> —C13—C12              | 146.9(6)  |
| C11—C10—C9              | 116.2(4) | C14—C13—C12                            | 95.2(4)   |
| C12—N3—C12 <sup>i</sup> | 82.2(9)  | C12 <sup>i</sup> —C13—C12              | 51.7(6)   |

Symmetry transformation used to generate equivalent atoms: 0.5-x, y, 1-z.

'*i*' has been used to indicate identical atoms

## References

1. L. J. Bartolotti and K. Fluchick, *In Reviews in Computational Chemistry*; K. B. Lipkowitz and D. Boyd, Ed. VCH: New York, 1996, **7**, 187.
2. (a) P. Hay and W. R. Wadt, *J. Chem. Phys.*, 1985, **82**, 270; (b) W. R. Wadt and P. Hay, *J. Chem. Phys.*, 1985, **82**, 284; (c) P. Hay and W. R. Wadt, *J. Chem. Phys.*, 1985, **82**, 299.
3. M. J. Frisch, G. W. Trucks, H. B. Schlegel, G. E. Scuseria, M. A. Robb, J. R. Cheeseman, G. Scalmani, V. Barone, B. Mennucci, G. A. Petersson, H. Nakatsuji, M. Caricato, X. Li, H. P. Hratchian, A. F. Izmaylov, J. Bloino, G. Zheng, J. L. Sonnenberg, M. Hada, M. Ehara, K. Toyota, R. Fukuda, J. Hasegawa, M. Ishida, T. Nakajima, Y. Honda, O. Kitao, H. Nakai, T. Vreven, J. A. Montgomery, Jr., J. E. Peralta, F. Ogliaro, M. Bearpark, J. J. Heyd, E. Brothers, K. N. Kudin, V. N. Staroverov, R. Kobayashi, J. Normand, K. Raghavachari, A. Rendell, J. C. Burant, S. S. Iyengar, J. Tomasi, M. Cossi, N. Rega, J. M. Millam, M. Klene, J. E. Knox, J. B. Cross, V. Bakken, C. Adamo, J. Jaramillo, R. Gomperts, R. E. Stratmann, O. Yazyev, A. J. Austin, R. Cammi, C. Pomelli, J. W. Ochterski, R. L. Martin, K. Morokuma, V. G. Zakrzewski, G. A. Voth, P. Salvador, J. J. Dannenberg, S. Dapprich, A. D. Daniels, Ö. Farkas, J. B. Foresman, J. V. Ortiz, J. Cioslowski, and D. J. Fox, Gaussian 09, revision A.1, Gaussian, Inc., Wallingford, CT, 2009.
4. G. M. Sheldrick, *SHELXL-97, Program for X-ray Crystal Structure Refinement*; Göttingen University: Göttingen, Germany, 1997.
5. X.-F. Shen, Y.-S. Ding, J. C. Hanson, M. Aindow and S. L. Suib, *J. Am. Chem. Soc.*, 2006, **128**, 4570.
